# Supplementary material
Source: PubMed Central journal article supplement (PMC8373668)

### Supplemental Figure1: CLC Vaccination Level Sensitivity Analysis for Determining Index Week

We performed a sensitivity analysis of using index week thresholds of 25% first dose vaccination in the CLC and 75% first dose vaccination within the CLC. Panel A displays the index week as the week where 25% of residents receive the first dose of SARS-CoV-2 Vaccine. Panel B calculated the index week as 75% of residents receiving the first dose of vaccine

Panel A: Index week defined as 25% of residents receiving first vaccine dose

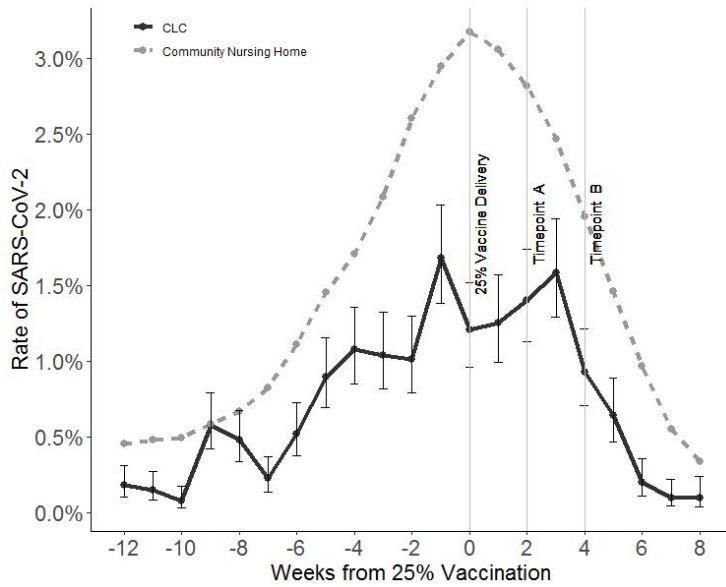

Panel B: Index week defined as 75% of residents receiving first vaccine dose

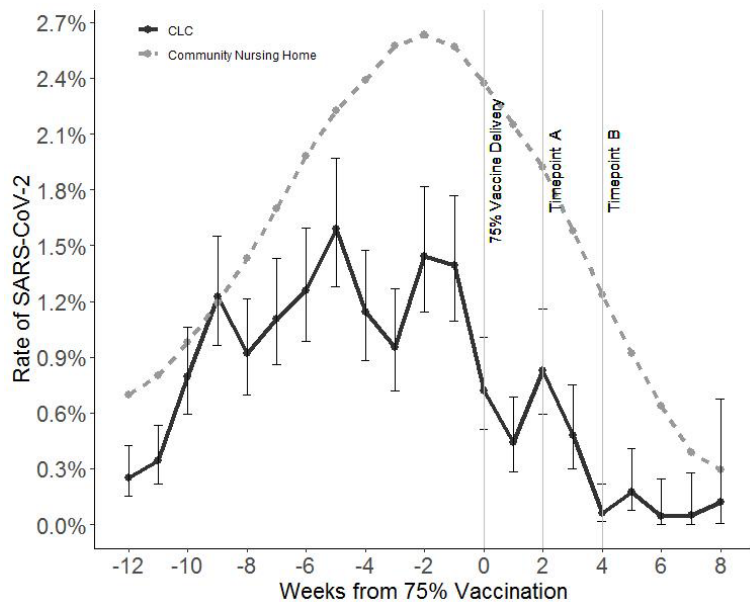

Supplement: NIHMS1704527-supplement-fS1.pdf [file NIHMS1704527-supplement-fS1.pdf]
